# Supplementary material for: Dynamic polyurethane thermosets: tuning associative/dissociative behavior by catalyst selection
Source: Royal Society of Chemistry journal article supplement (doi:10.1039/d0py00842g), 2020-01-01
Supplement: d0py00842g1.pdf [file d0py00842g1.pdf]

## Supporting Information

# Dynamic polyurethane thermosets: tuning associative/dissociative behavior by catalyst selection

**Fermin Elizalde<sup>1,\*</sup>, Robert H. Aguirresarobe<sup>1</sup>, Alba Gonzalez<sup>1</sup>, Haritz Sardon<sup>1,\*</sup>**

<sup>1</sup>POLYMAT, University Of the Basque Country UPV/EHU, Joxe Mari Korta Center, Avda. Tolosa 72, 20018 Donostia---San Sebastian, Spain

1. FT-IR characterization and representative images
2. Stress-relaxation measurements
3. DMTA measurements
- 4 .<sup>1</sup>H-NMR characterization for aromatic model urethane reactions
5. MALDI-TOF characterization
6. Model Urethane Compounds: <sup>1</sup>H-NMR characterization
7. Model Diurethane Compounds: <sup>1</sup>H-NMR characterization

## 1. FT-IR characterization and representative images

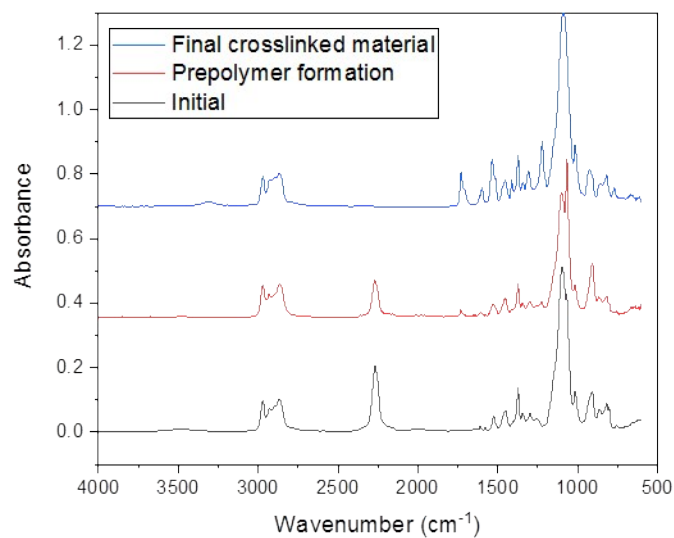

**Figure S1.** Representative FTIR spectra of the reaction of PPG triol ( $M_n=3740$  g/mol) with MDI at  $t=0$ min (black trace) and  $t=300$  min (pre-polymer formation, red trace). Blue trace corresponds to the final polyurethane film cross-linked for 24h at 70°C with 1,6-Hexanediol.

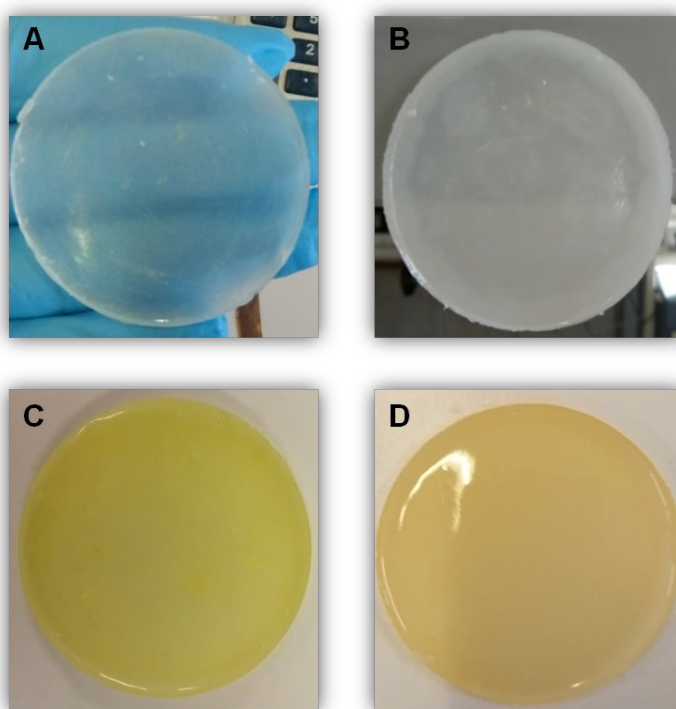

**Figure S2.** A) Aromatic polyurethane film cross-linked without catalyst. B) Aromatic polyurethane film cross-linked with DBTDL. C) Aromatic polyurethane film cross-linked with PTSA D) Aromatic polyurethane film cross-linked with TBD.

## 2. Stress-relaxation measurements

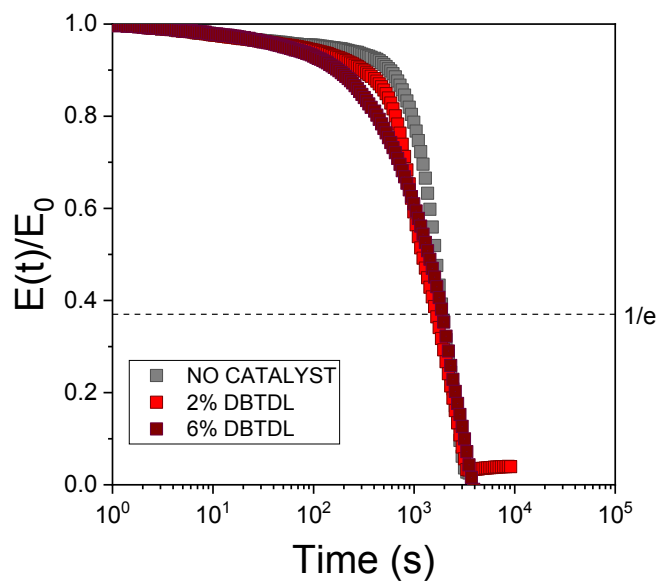

**Figure S3.** Stress-relaxation measurements for aliphatic (HDI) polyurethanes cross-linked with 2% and 6% of DBTDL performed at 120°C.

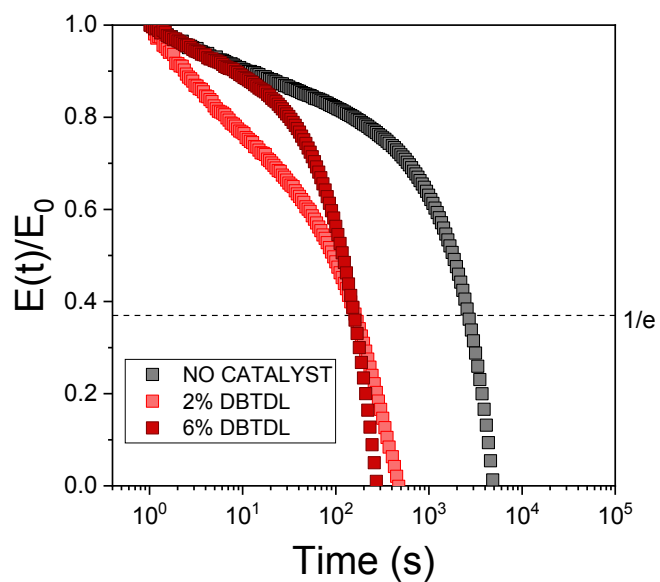

**Figure S4.** Stress-relaxation measurements for aromatic (MDI) polyurethanes cross-linked with 2% and 6% of DBTDL performed at 120°C.

### 3. DMTA measurements

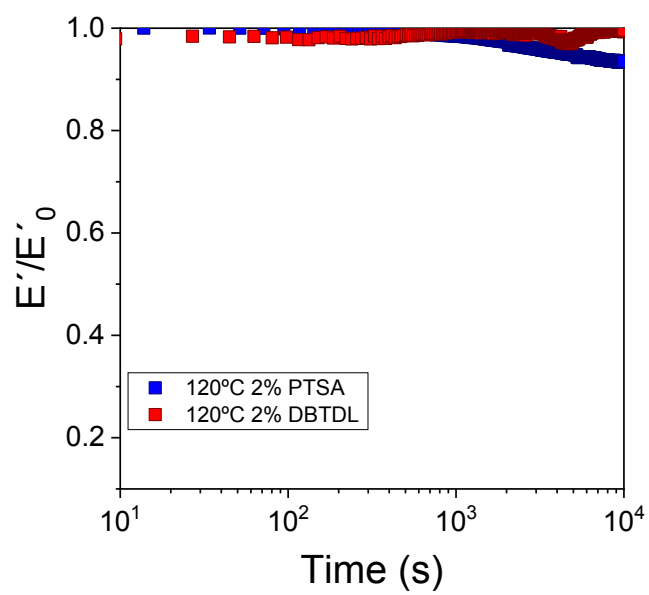

**Figure S5.** DMTA measurements for aromatic (MDI) polyurethanes cross-linked with 2% of DBTDL (red) and 2% of PTSA (blue) performed at 120°C.

#### 4. $^1\text{H}$ -NMR for alcohol mediated transcarbamoylation aromatic model reactions

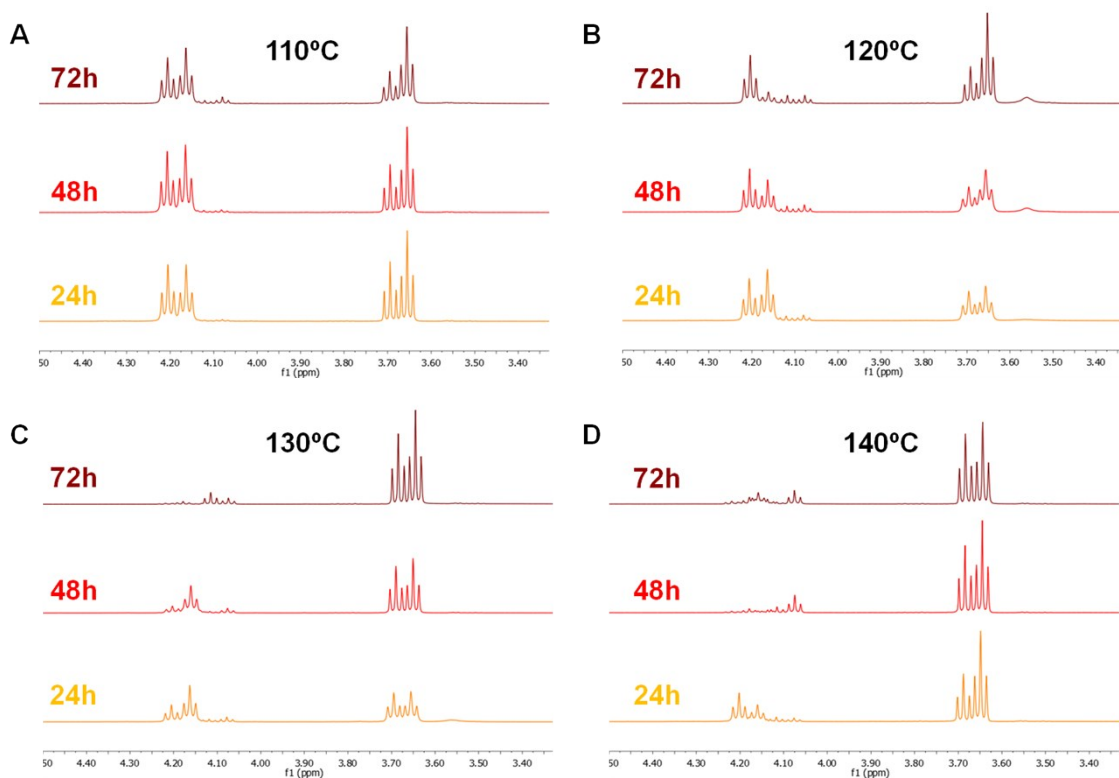

**Figure S6.**  $^1\text{H}$ -NMR measurements for aromatic polyurethane model reactions catalyzed with 2% of DBTDL performed at 110°C (A), 120°C (B), 130°C (C) and 140°C (D).

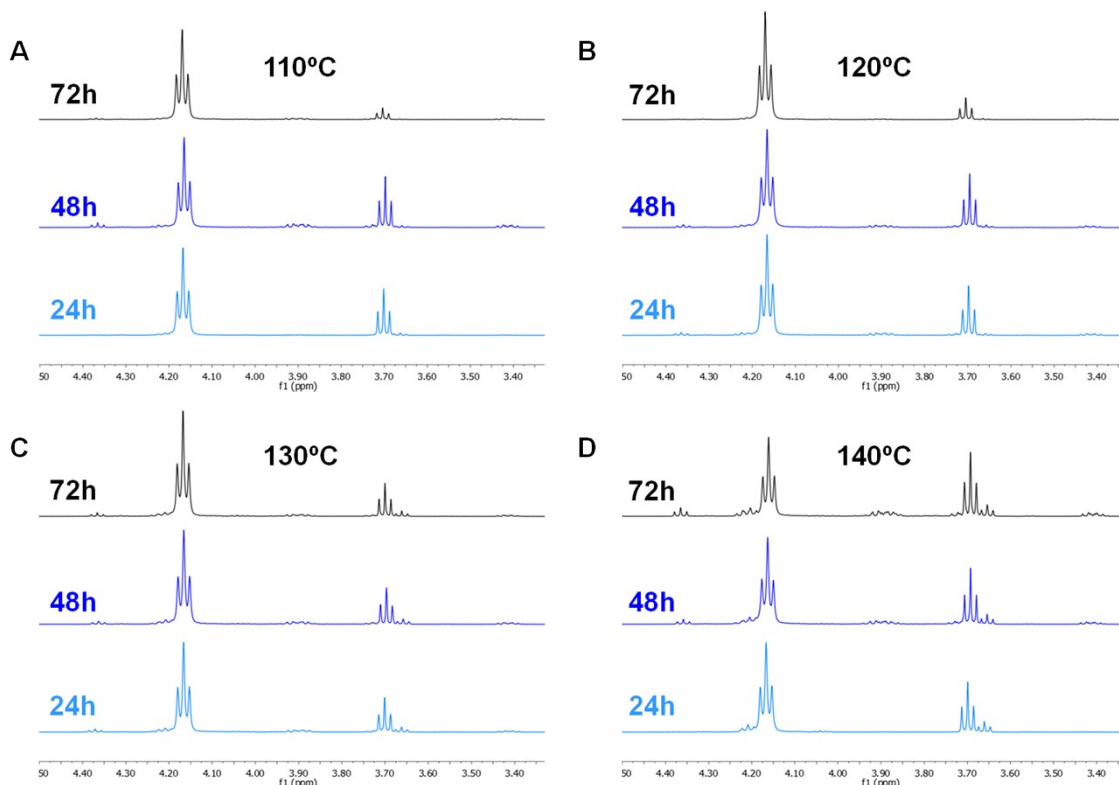

**Figure S7.**  $^1\text{H}$ -NMR measurements for aromatic polyurethane model reactions catalyzed with 2% of p-TSA performed at 110°C (A), 120°C (B), 130°C (C) and 140°C (D).

## 5. MALDI-TOF characterization

In this part, the MALDI-TOF characterization of every synthesized model diurethane compound employed for the study of the dissociative transcarbamoylation exchange is shown. The MALDI-TOF spectrum of the employed DCTB matrix is shown also.

*DCTB Matrix*

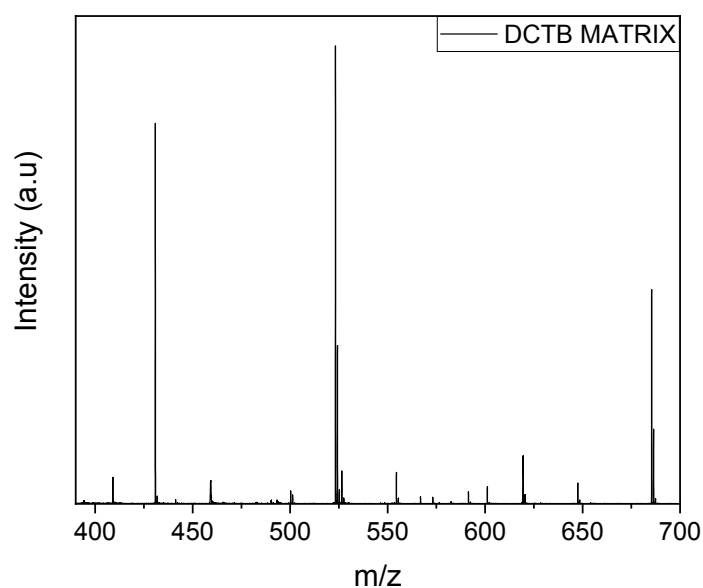

**Figure S8.** Characterization by MALDI-TOF of the employed DCTB matrix.

Most relevant signals corresponding to DCTB Matrix: 409.056, 430.589, 459.233, 500.253, 523.248, 526.483, 554.514, 619.496 and 685.403.

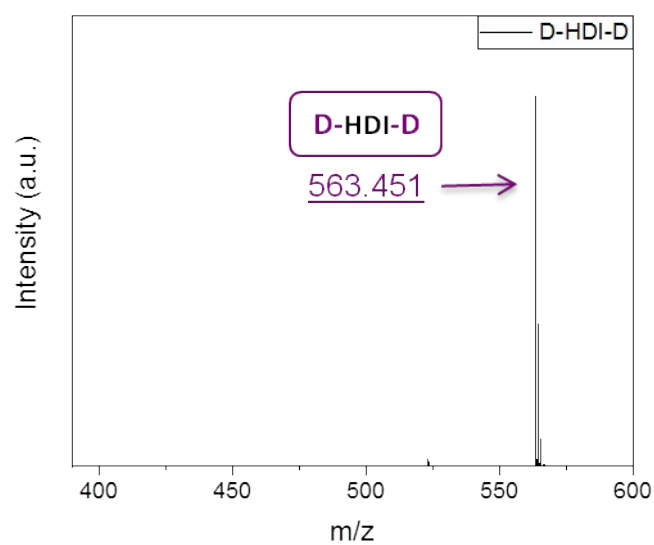

**Figure S9.** Characterization by MALDI-TOF of *Didodecyl hexane-1,6- diyldicarbamate* (D-HDI-D).

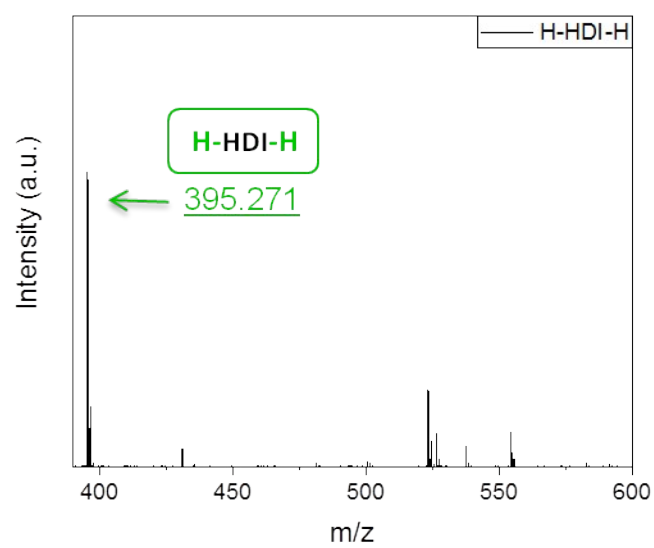

**Figure S10.** Characterization by MALDI-TOF of *Dihexyl hexane-1,6- diyldicarbamate* (H-HDI-H).

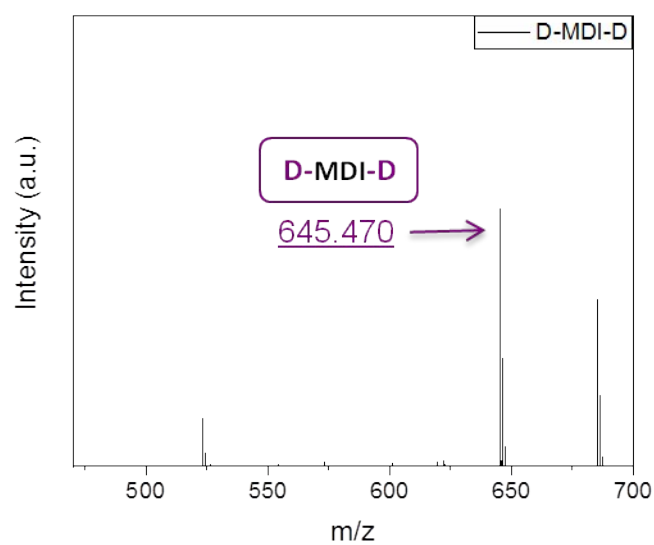

**Figure S11.** Characterization by MALDI-TOF of *Didodecyl (methylenebis(4,1-phenylene))dicarbamate* (D-MDI-D).

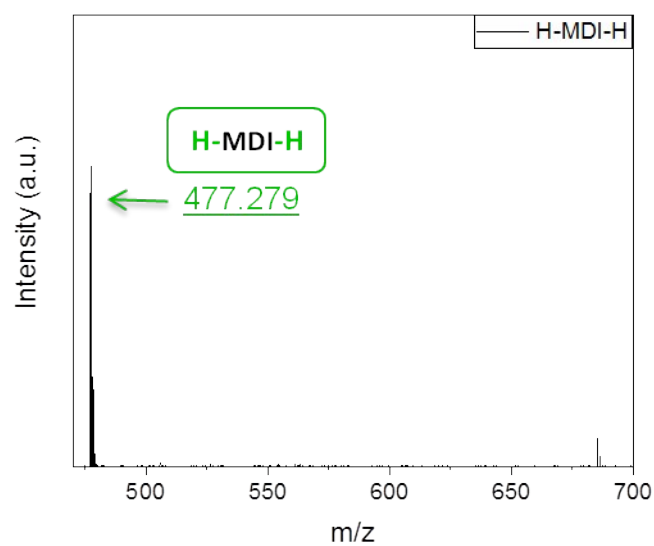

**Figure S12.** Characterization by MALDI-TOF of *Dihexyl (methylenebis(4,1-phenylene))dicarbamate* (H-MDI-H).



## 6. Model Urethane Compounds: $^1\text{H}$ -NMR characterization

### Dodecyl hexyl carbamate

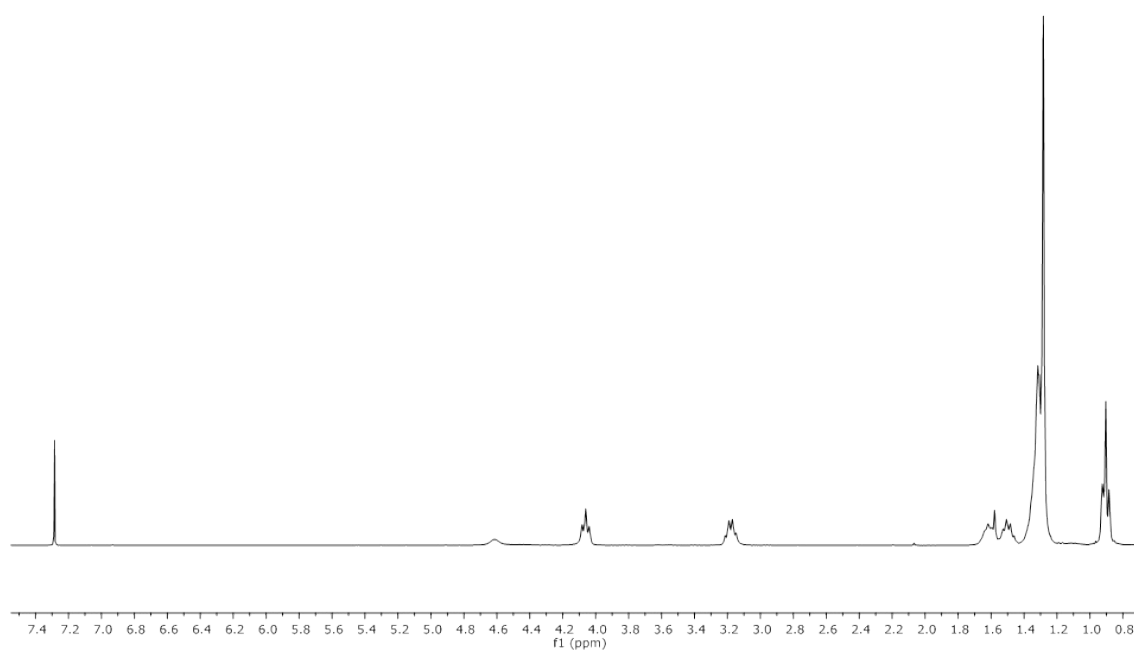

**Figure S13.**  $^1\text{H}$ -NMR spectra of dodecyl hexyl carbamate.

$^1\text{H}$  NMR (300 MHz, Chloroform-*d*)  $\delta$  4.61 (s, 1H), 4.06 (td,  $J = 6.7$ , 0.0 Hz, 2H), 3.18 (q,  $J = 6.7$  Hz, 2H), 1.71 – 1.58 (m, 4H), 1.49 (q,  $J = 7.0$  Hz, 2H), 1.31 (dd,  $J = 8.3$ , 0.0 Hz, 22H), 1.02 – 0.77 (m, 6H).

**Dodecyl p-tolyl carbamate**

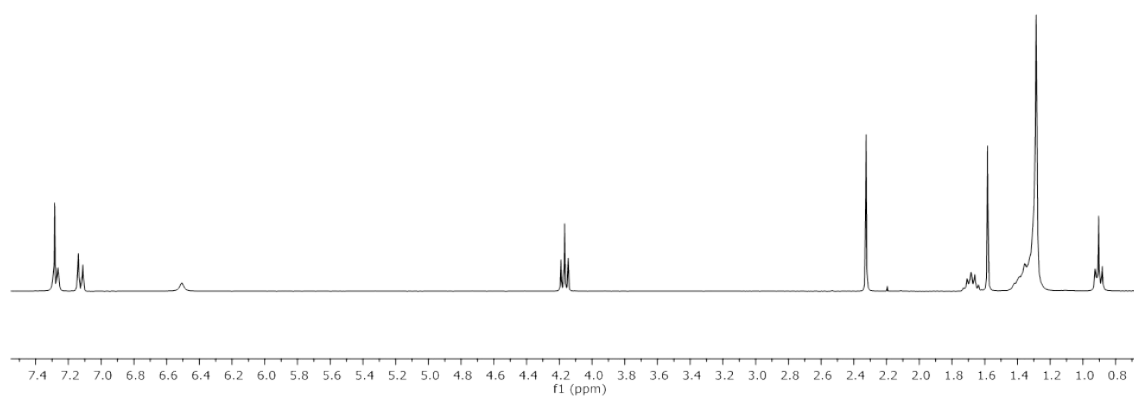

**Figure S14.**  $^1\text{H}$ -NMR spectra of dodecyl p-tolyl carbamate.

$^1\text{H}$  NMR (300 MHz, Chloroform-*d*)  $\delta$  7.37 – 7.19 (m, 2H), 7.13 (d,  $J$  = 8.3 Hz, 2H), 6.51 (s, 1H), 4.17 (t,  $J$  = 6.7 Hz, 2H), 2.33 (s, 3H), 1.76 – 1.62 (m, 2H), 1.29 (m,  $J$  = 5.2 Hz, 18H), 0.98 – 0.83 (m, 3H).

## 7. Model diurethane compounds: $^1\text{H}$ -NMR characterization

### Didodecyl hexane -1,6- diyldicarbamate

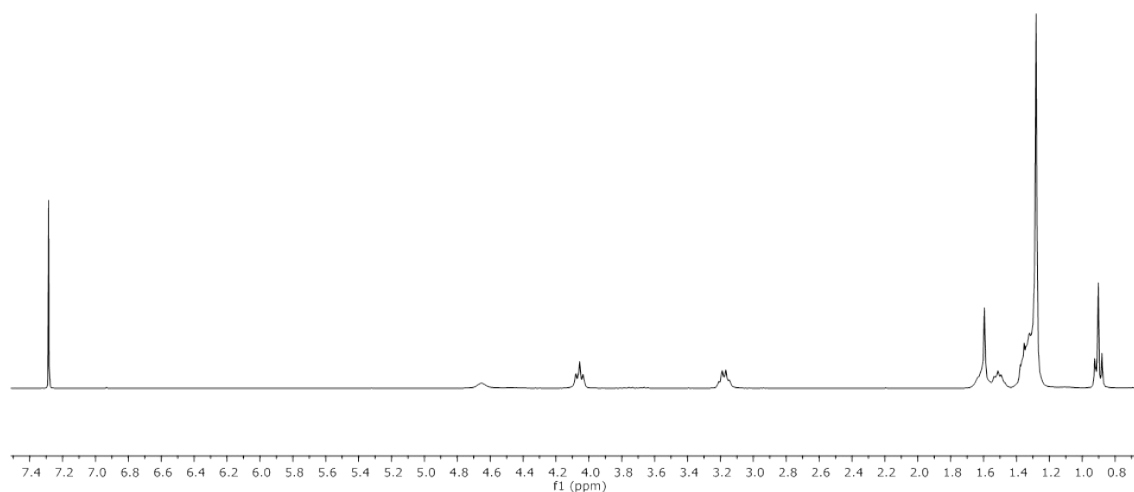

**Figure S15.**  $^1\text{H}$ -NMR spectra of didodecyl hexane -1,6- diyldicarbamate.

$^1\text{H}$  NMR (300 MHz, Chloroform-*d*)  $\delta$  4.65 (s, 2H), 4.06 (t,  $J$  = 6.7 Hz, 4H), 3.18 (q,  $J$  = 6.6 Hz, 4H), 1.61 (d,  $J$  = 6.0 Hz, 8H), 1.51 (t,  $J$  = 6.6 Hz, 2H), 1.42 – 1.16 (m, 38H), 0.97 – 0.81 (m, 6H).

**Dihexyl hexane -1,6- diyldicarbamate**

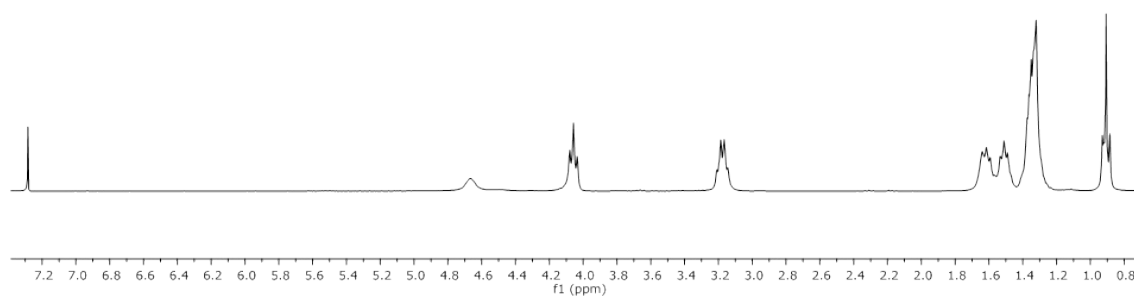

**Figure S16.** <sup>1</sup>H-NMR spectra of dihexyl hexane -1,6- diyldicarbamate.

<sup>1</sup>H NMR (300 MHz, Chloroform-*d*)  $\delta$  4.67 (s, 2H), 4.06 (t,  $J$  = 6.7 Hz, 4H), 3.18 (q,  $J$  = 6.6 Hz, 4H), 1.72 – 1.55 (m, 4H), 1.51 (t,  $J$  = 6.6 Hz, 4H), 1.43 – 1.22 (m, 16H), 0.98 – 0.81 (m, 6H).

**Didodecyl (methylenebis(4,1-phenylene)) dicarbamate**

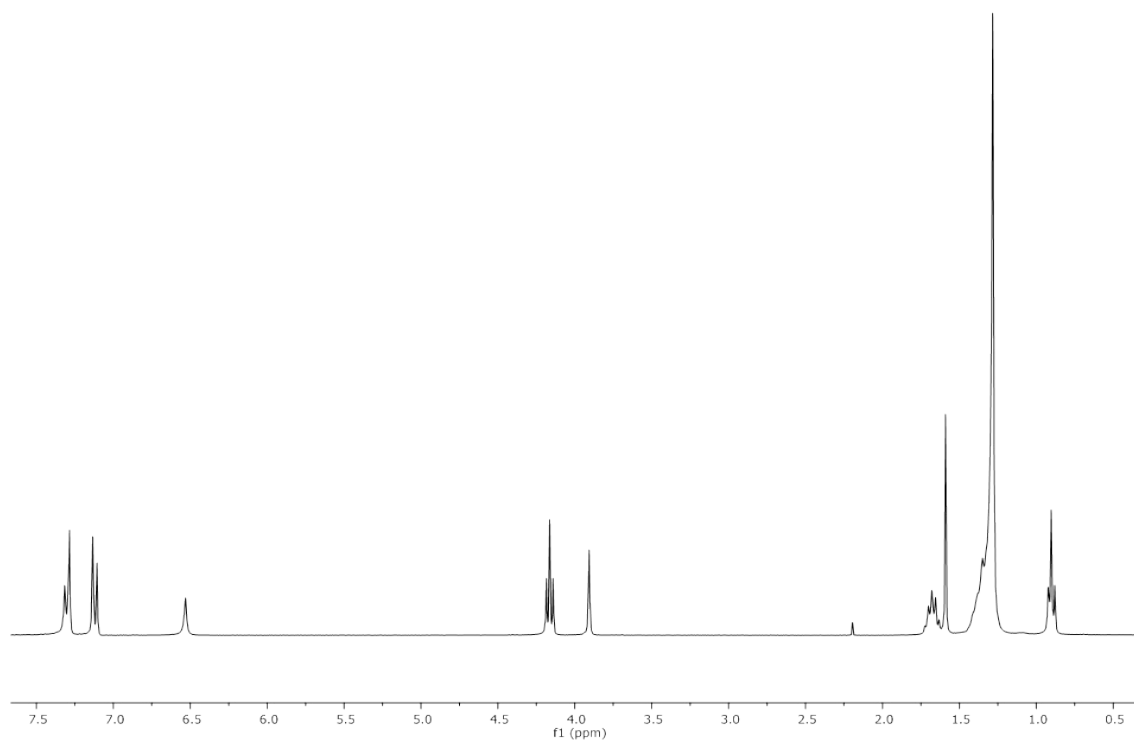

**Figure S17.**  $^1\text{H}$ -NMR spectra of didodecyl (methylenebis(4,1-phenylene)) dicarbamate.

$^1\text{H}$  NMR (300 MHz, Chloroform-*d*)  $\delta$  7.38 – 7.25 (m, 4H), 7.12 (d,  $J$  = 8.4 Hz, 4H), 6.53 (s, 2H), 4.16 (t,  $J$  = 6.7 Hz, 4H), 3.91 (s, 2H), 1.67 (q,  $J$  = 7.0 Hz, 4H), 1.29 (m,  $J$  = 4.6 Hz, 36H), 0.99 – 0.82 (m, 6H).

**Dihexyl (methylenebis(4,1-phenylene)) dicarbamate**

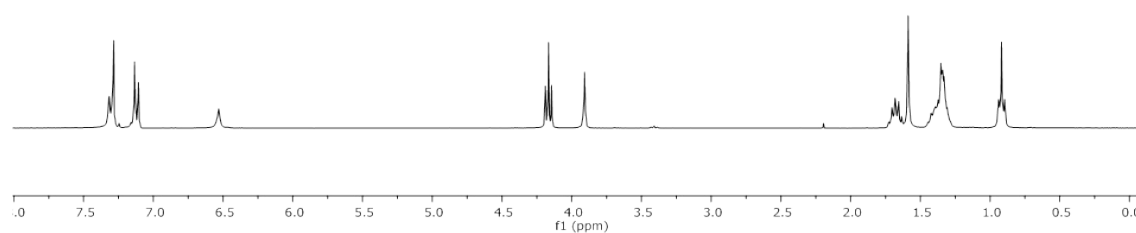

**Figure S18.**  $^1\text{H}$ -NMR spectra of dihexyl (methylenebis(4,1-phenylene))dicarbamate.

$^1\text{H}$  NMR (300 MHz, Chloroform-*d*)  $\delta$  7.39 – 7.27 (m, 4H), 7.20 – 7.01 (m, 4H), 6.53 (s, 2H), 4.17 (t,  $J$  = 6.7 Hz, 4H), 3.91 (s, 2H), 1.67 (dt,  $J$  = 8.0, 6.5 Hz, 4H), 1.48 – 1.18 (m, 12H), 0.92 (td,  $J$  = 6.9, 5.7, 2.9 Hz, 6H).
